# Supplementary material for: Temporal and spatial variability of ammonia in urban and agricultural regions of northern Colorado, United States
Source: Copernicus journal article supplement (doi:10.5194/acp-17-6197-2017), 2017-05-22
Supplement: Supplementary file 1 [file acp-17-6197-2017-supplement.pdf]

Supplement of Atmos. Chem. Phys., 17, 6197–6213, 2017  
<http://www.atmos-chem-phys.net/17/6197/2017/>  
doi:10.5194/acp-17-6197-2017-supplement  
© Author(s) 2017. CC Attribution 3.0 License.

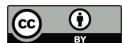

Atmospheric  
Chemistry  
and Physics  
Open Access  
EGU

*Supplement of*

## **Temporal and spatial variability of ammonia in urban and agricultural regions of northern Colorado, United States**

**Yi Li et al.**

*Correspondence to:* Jeffrey L. Collett Jr. ([collett@atmos.colostate.edu](mailto:collett@atmos.colostate.edu))

The copyright of individual parts of the supplement might differ from the CC-BY 3.0 licence.

Table S1. Meteorological information near the sites from May to August in each year

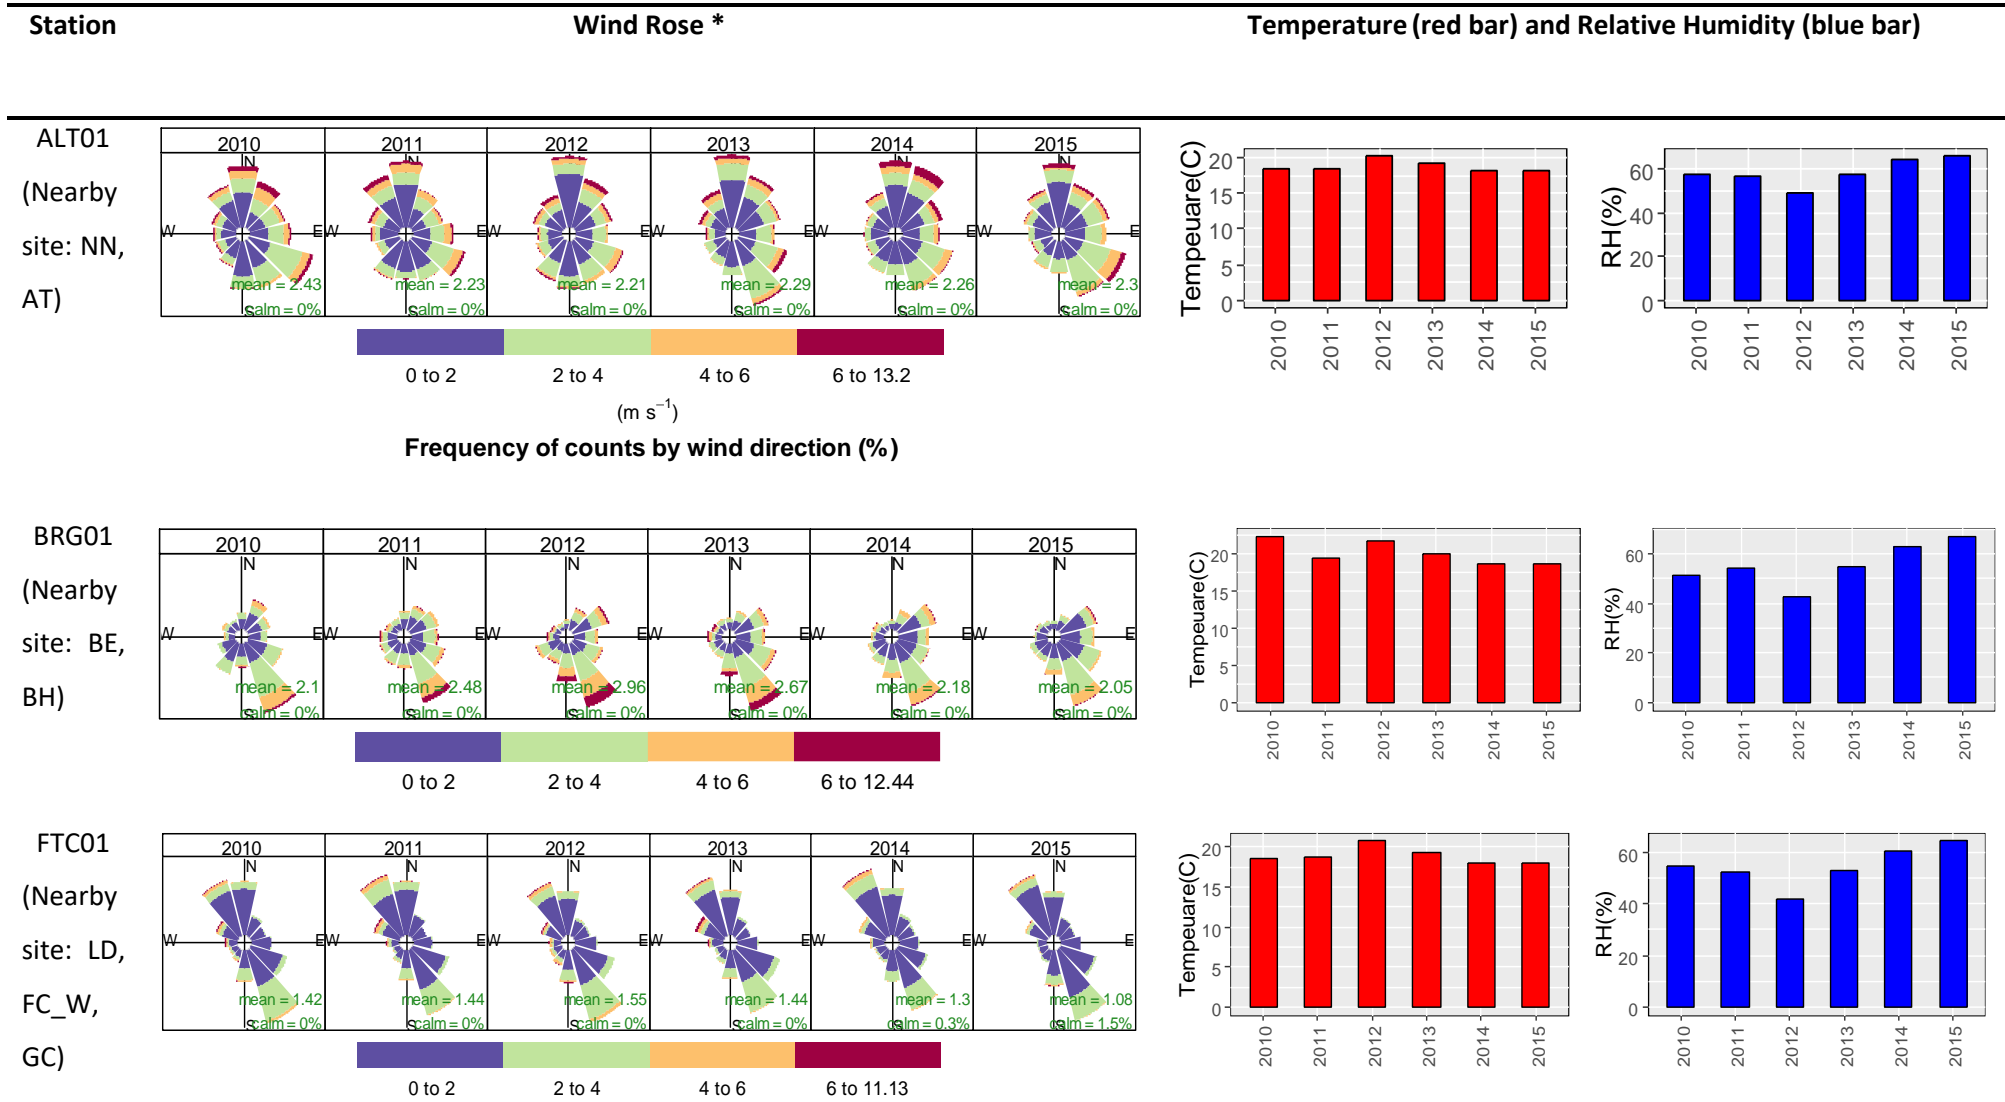

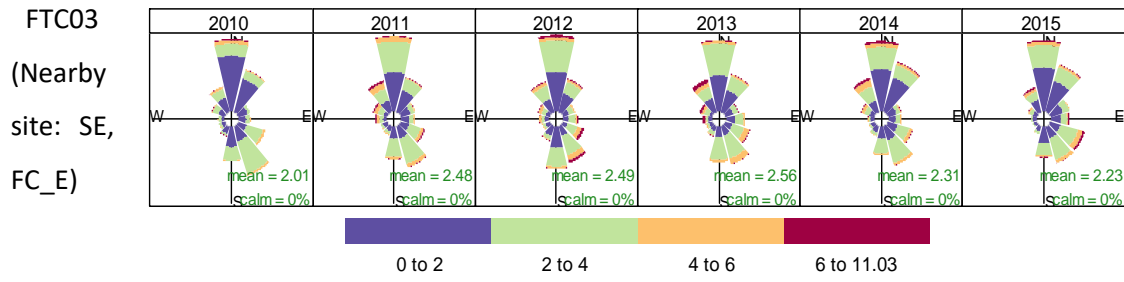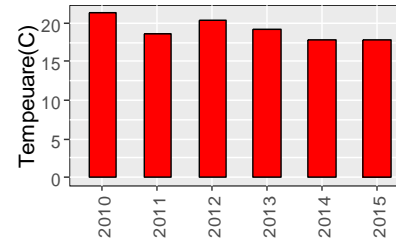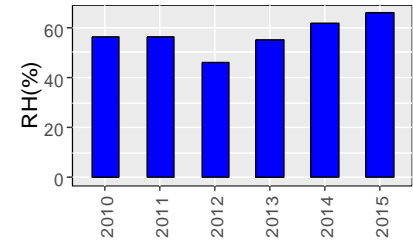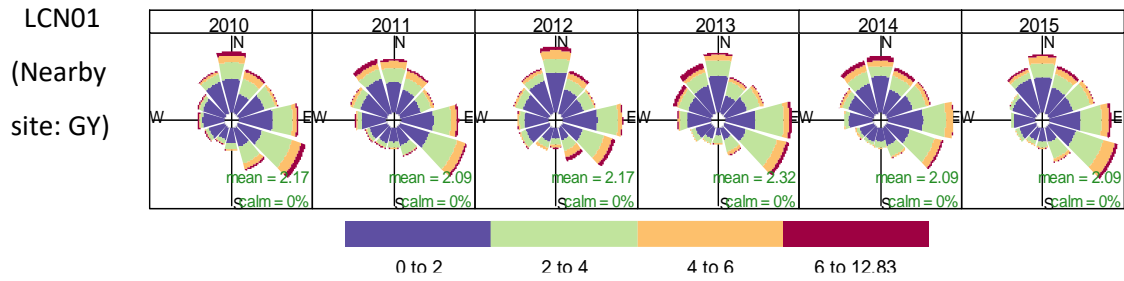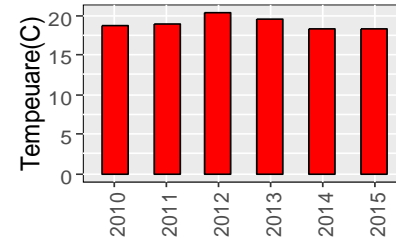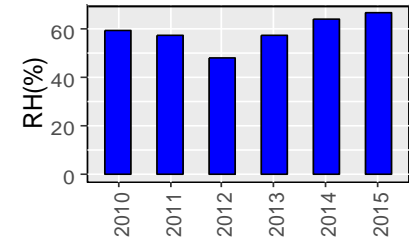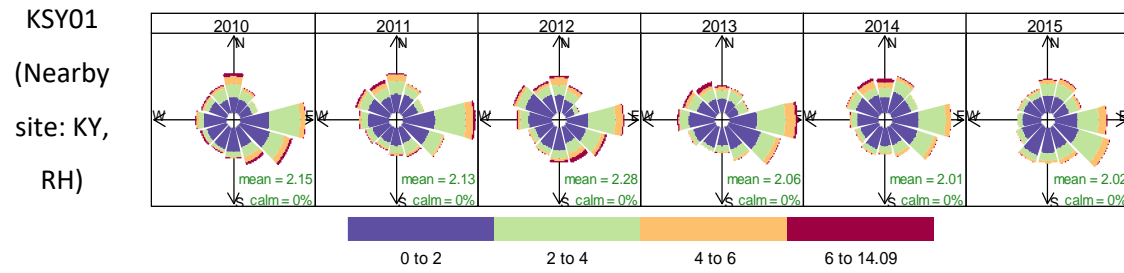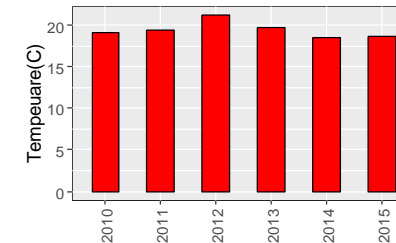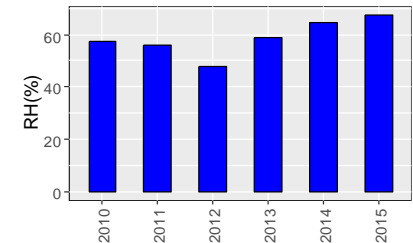

\* Wind speeds (unit: m/s) were indicated by color bars

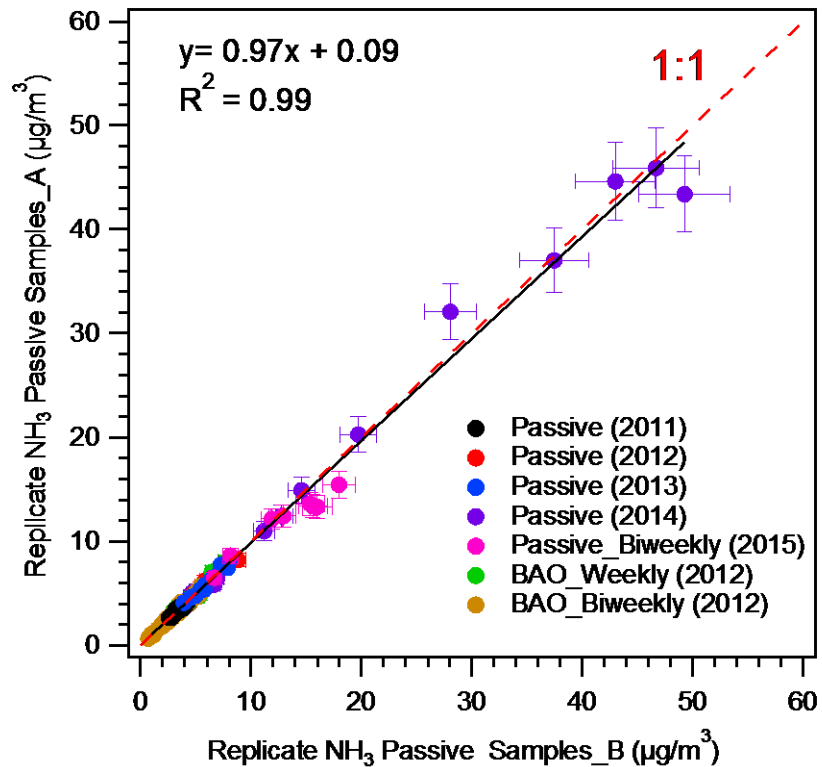

Fig.S1. Comparison of ammonia concentrations measured by replicate passive samples. The error bars represent the relative standard deviation of 8.9 % calculated from all 288 pooled replicate samples.

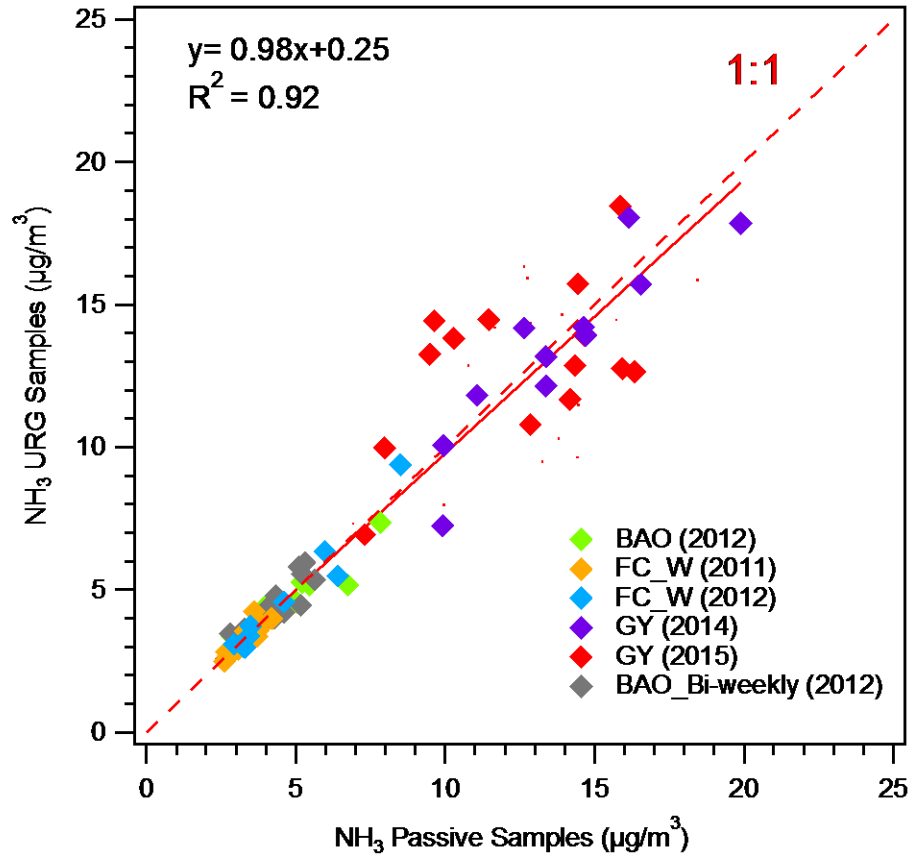

Fig.S2. Comparison of NH<sub>3</sub> concentrations from the Radiello passive samplers and URG samplers.

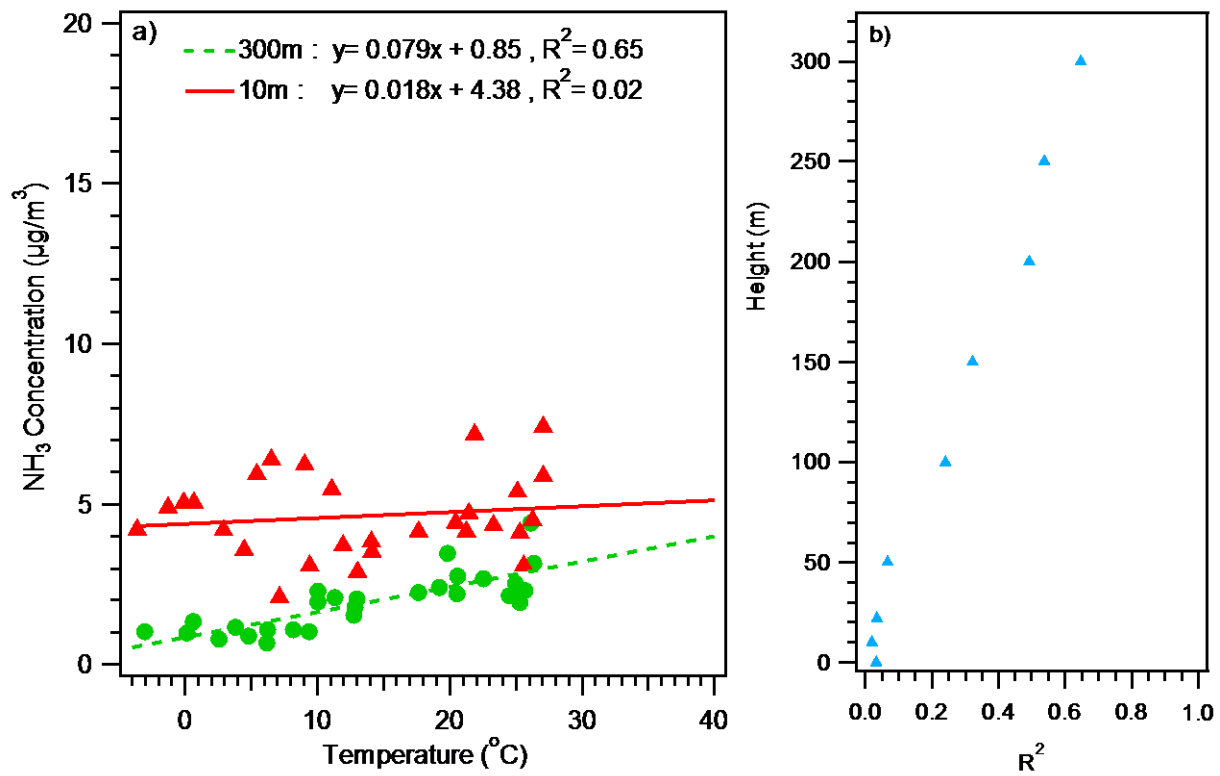

Fig.S3. (a) NH<sub>3</sub> concentration versus temperature at 10 m and 300 m and (b) correlation coefficients between NH<sub>3</sub> concentration and temperatures at different heights of the BAO tower.

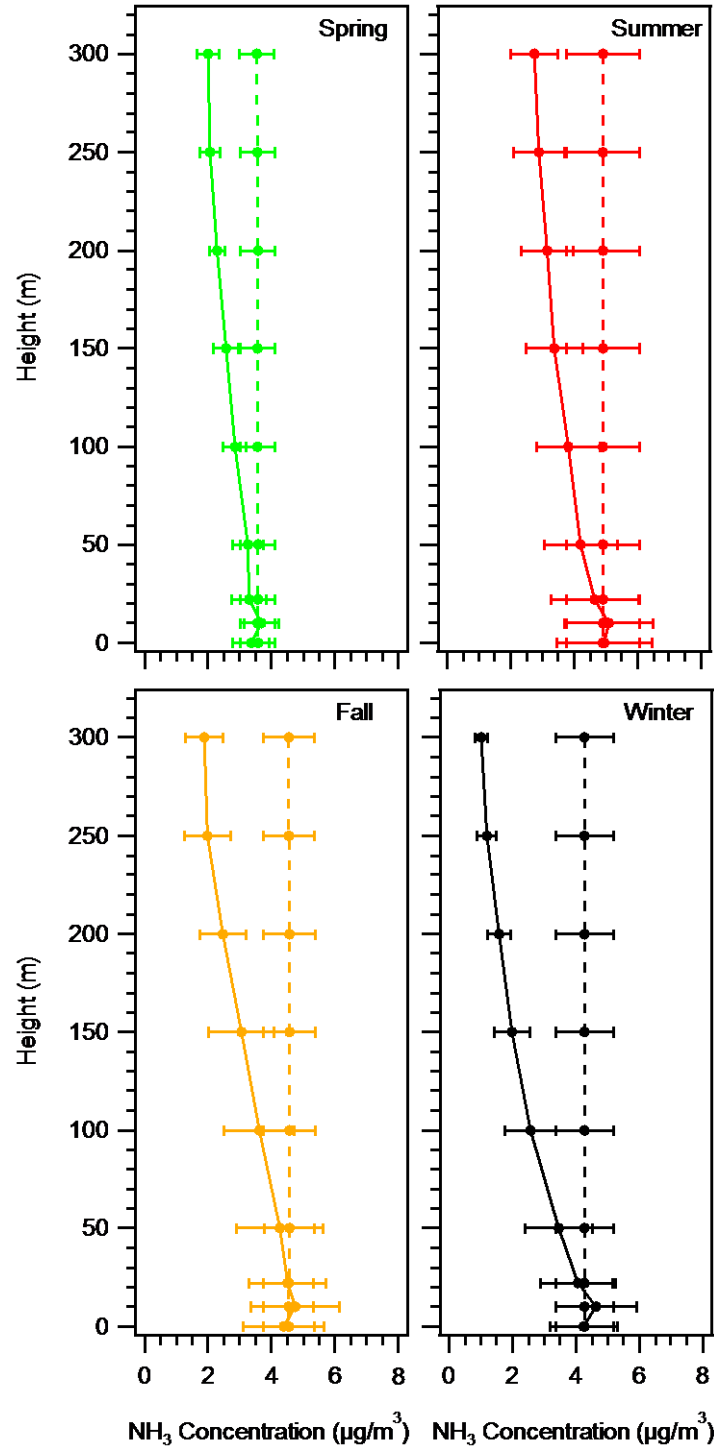

Fig.S4. Seasonal average vertical profiles of NH<sub>3</sub> measured at the BAO tower (solid line) and ISORROPIA II model results (dashed line) in 2012. The x-error bars represent the relative standard deviation of NH<sub>3</sub> concentrations.

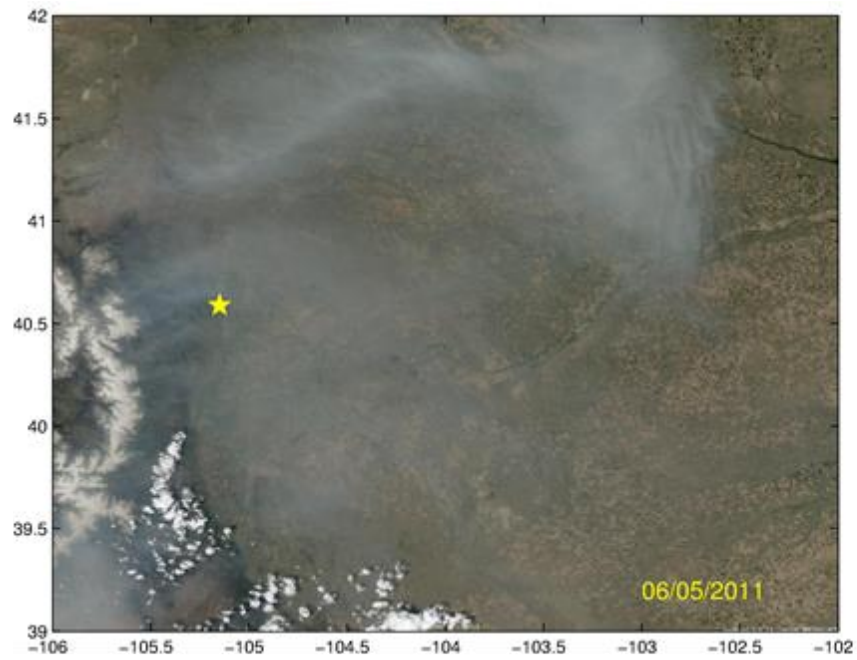

Fig.S5. Satellite image of the wildfire plume over northeastern Colorado caught by the Moderate Resolution Imaging Spectroradiometer (MODIS) (Image downloaded at <http://loatec.univ-lille1.fr/TerreEtCiel/module.php?lang=us>). The FC\_W site is indicated by a yellow star.



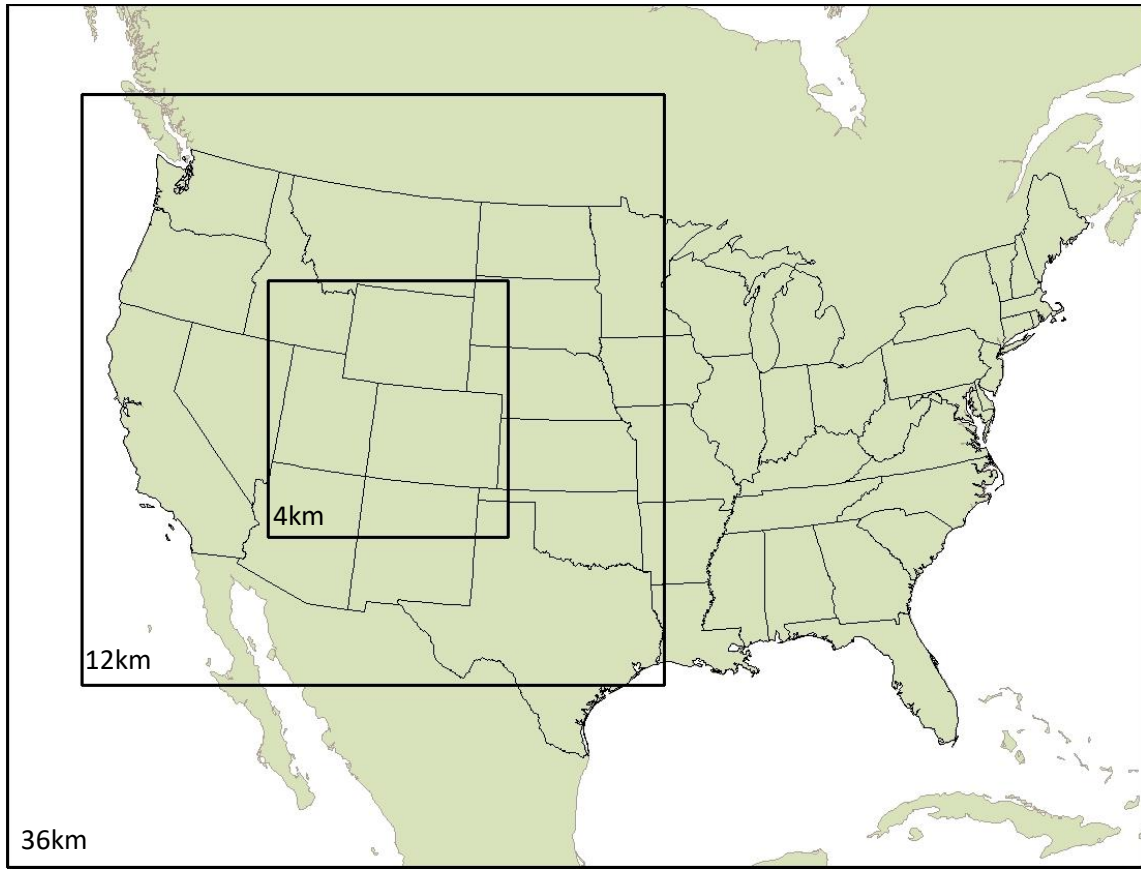

Fig.S6. The 36-km horizontal grid resolution outer domain, represented by the extent of the larger box, covers the contiguous United States, northern Mexico, and southern Canada. The 12-km domain includes states surrounding Colorado. The inner 4-km domain extends over Colorado, Utah, Wyoming and portions of surrounding states.
